# Supplementary material for: Uniform grain-size distribution in the active layer of a shallow, gravel-bedded, braided river (the Urumqi River, China) and implications for paleo-hydrology
Source: Copernicus journal article supplement (doi:10.5194/esurf-6-1011-2018), 2018-11-07
Supplement: Supplementary file [file esurf-6-1011-2018-supplement-title-page.pdf › esurf-6-1011-2018-supplement-title-page.pdf]

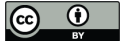

## *Supplement of*

# **Uniform grain-size distribution in the active layer of a shallow, gravel-bedded, braided river (the Urumqi River, China) and implications for paleo-hydrology**

**Laure Guerit et al.**

*Correspondence to:* Laure Guerit (laure.guerit@get.omp.eu)

- esurf-6-1011-2018-supplement-title-page.pdf
- Supp
  - .DS\_Store
  - A1.txt
  - A2.txt
  - A3.txt
  - A4.txt
  - A5.txt
  - B1.txt
  - B2.txt
  - B3.txt
  - B4.txt
  - B5.txt
  - C1.txt
  - C2.txt
  - C3.txt
  - C4.txt
  - C5.txt
  - D1.txt
  - D2.txt
  - D3.txt
  - D4.txt
  - D5.txt

- E1.txt
- E2.txt
- E3.txt
- E4.txt
- E5.txt
- F1.txt
- F2.txt
- F3.txt
- F4.txt
- F5.txt
- SupplementaryMaterial.pdf
- VSC.txt

The copyright of individual parts of the supplement might differ from the CC BY 4.0 License.
